# Supplementary material
Source: publisher figshare collection journal article supplement (https://acs.figshare.com/ndownloader/files/11546495)
Supplement: Supplementary file 1 [file 11546495]

Supporting Information for

**Photoinduced Localized Hole Delays Nonradiative Electron–Hole  
Recombination in Cesium–Lead Halide Perovskites: A Time-Domain  
*Ab Initio* Analysis**

Jinlu He,<sup>1</sup> Meng Guo,<sup>2</sup> Run Long<sup>1\*</sup>

<sup>1</sup>*College of Chemistry, Key Laboratory of Theoretical & Computational  
Photochemistry of Ministry of Education, Beijing Normal University, Beijing, 100875,  
P. R. China*

<sup>2</sup>*Shandong Computer Science Center (National Supercomputer Center in Jinan),  
Jinan, Shandong Province P. R. China, 250101*

---

\* Corresponding author, E-mail: runlong@bnu.edu.cn

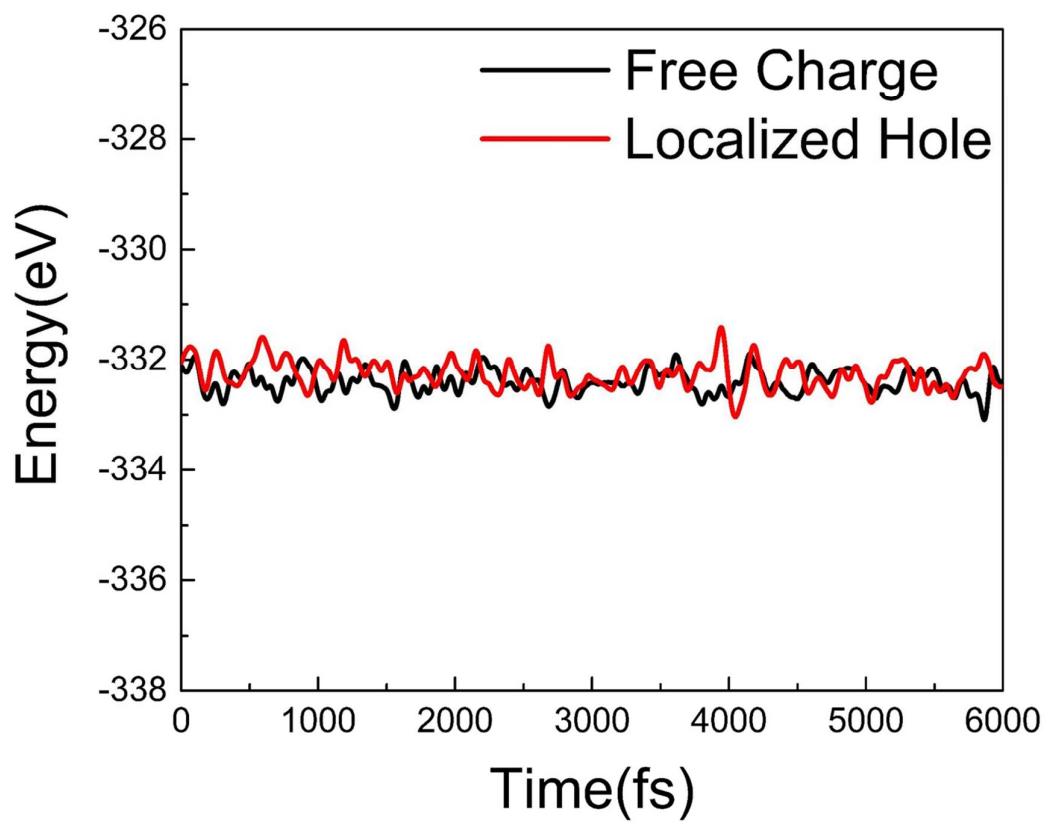

**Figure S1.** The evolution of total energy for the CsPbBr<sub>3</sub> with free charge (black line) and localized hole (red line) for 6 ps MD simulation.

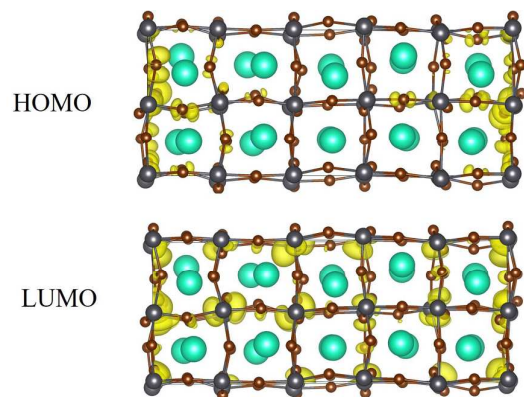

**Figure S2.** HOMO and LUMO charge densities in polaron structure of  $(2 \times 2 \times 5)$  CsPbBr<sub>3</sub> at 300 K. HOMO is localized on the Br and Pb atoms of both edges and the LUMO is delocalized on the entire cell, which is consistent with the charge distribution in Figure 3.

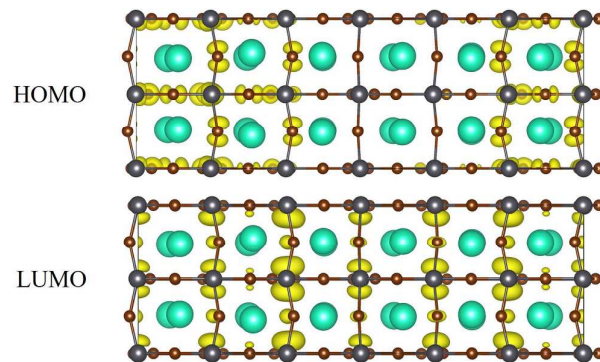

**Figure S3.** Charge densities of HOMO and LUMO for the  $(2 \times 2 \times 6)$  CsPbBr<sub>3</sub> supercell with localized hole obtained using the optimized geometry at 0 K. The localized hole CsPbBr<sub>3</sub> structure is created by changing the angles of Pb-Br-Pb and length of Pb-Br bonds in the  $(2 \times 2 \times 6)$  supercell. The HOMO is localized on partial Br and Pb atoms of the both edges, while the LUMO is delocalized on the whole simulation cell.
